# Supplementary material for: Electrospun Materials Based on Cellulose Acetate Loaded with Rosmarinic Acid with Antioxidant and Antifungal Properties
Source: MDPI journal article supplement (doi:10.3390/biomimetics9030152), 2024-03-01
Supplement: s1 [file s1]

## Supplementary Material

### Electrospun materials based on cellulose acetate loaded with rosmarinic acid with antioxidant and antifungal properties

Mariya Spasova\*, Nikoleta Stoyanova and Olya Stoilova\*

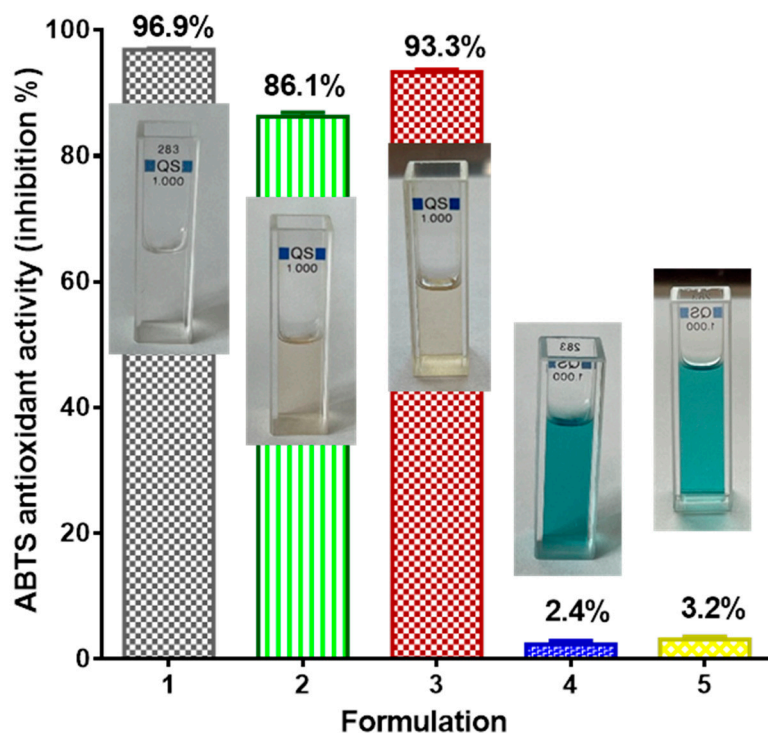

**Figure S1.** Antioxidant activity determined by ABTS method of: RA ethanol solution (1); and fibrous CA/RA (2); CA/PEG/RA (3); CA (4); CA/PEG (5) materials. \*\*\* $p < 0.001$ . Photos of the corresponding solutions are shown as digital images.
